# Supplementary material for: Community Health Resources, Globalization, Trust in Science, and Voting as Predictors of COVID-19 Vaccination Rates: A Global Study with Implications for Vaccine Adherence
Source: MDPI journal article supplement (doi:10.3390/vaccines10081343), 2022-08-18
Supplement: s1 [file s1]

**Table S1:** Countries Included for the Analysis of the Resources and Political and Attitudinal Models

| <i>Country</i>                                  | <i>Continent</i> | <i>Population 2021</i> | <i>Number of fully vaccinated persons per 100 of each country</i> |
|-------------------------------------------------|------------------|------------------------|-------------------------------------------------------------------|
| <i>Afghanistan (R)</i>                          | Asia             | 39835.428              | 11.999                                                            |
| <i>Algeria (R+P&amp;A)</i>                      | Africa           | 44616.624              | 14.78                                                             |
| <i>Angola (R)</i>                               | Africa           | 33933.61               | 19.253                                                            |
| <i>Argentina (R+P&amp;A)</i>                    | South America    | 45605.826              | 82.358002                                                         |
| <i>Australia (R+P&amp;A)</i>                    | Australia        | 25788.215              | 84.427002                                                         |
| <i>Barbados (R)</i>                             | Caribbean        | 287.711                | 52.863998                                                         |
| <i>Bangladesh (R+P&amp;A)</i>                   | Asia             | 166303.498             | 70.694                                                            |
| <i>Bolivia (R+P&amp;A)</i>                      | South America    | 11832.94               | 50.695                                                            |
| <i>Brazil (R+P&amp;A)</i>                       | South America    | 213993.437             | 74.742996                                                         |
| <i>Bulgaria (R+P&amp;A)</i>                     | Europe           | 6896.663               | 29.584                                                            |
| <i>Burkina Faso (R+P&amp;A)</i>                 | Africa           | 21497.096              | 7.3649998                                                         |
| <i>Burma/ Myanmar (R+P&amp;A)</i>               | Asia             | 54806.012              | 43.146999                                                         |
| <i>Cambodia (R+P&amp;A)</i>                     | Asia             | 16946.438              | 84.981003                                                         |
| <i>Cameroon (R+P&amp;A)</i>                     | Africa           | 27224.265              | 4.5549998                                                         |
| <i>Canada (R+P&amp;A)</i>                       | North America    | 38067.903              | 82.518997                                                         |
| <i>Chad (R)</i>                                 | Africa           | 16914.985              | 12.709                                                            |
| <i>Chile (R+P&amp;A)</i>                        | South America    | 19212.361              | 91.314003                                                         |
| <i>China (R)</i>                                | Asia             | 1444216.107            | 85.446999                                                         |
| <i>Colombia (R+P&amp;A)</i>                     | South America    | 51265.844              | 69.589996                                                         |
| <i>Costa Rica (R+P&amp;A)</i>                   | Central America  | 5139.052               | 80.178001                                                         |
| <i>Cuba (R+P&amp;A)</i>                         | Caribbean        | 11317.505              | 87.805                                                            |
| <i>Czech Republic (R+P&amp;A)</i>               | Europe           | 10724.555              | 64.156998                                                         |
| <i>Denmark (R+P&amp;A)</i>                      | Europe           | 5813.298               | 82.207001                                                         |
| <i>Democratic Republic of Congo (R+P&amp;A)</i> | Africa           | 92377.993              | 1.189                                                             |
| <i>Dominican Republic</i>                       | Caribbean        | 10953.703              | 54.948002                                                         |
| <i>Ecuador (R+P&amp;A)</i>                      | South America    | 17888.475              | 78.762001                                                         |
| <i>Egypt (R+P&amp;A)</i>                        | Africa           | 104258.327             | 33.695                                                            |
| <i>El Salvador (R+P&amp;A)</i>                  | Central America  | 6518.499               | 66.114998                                                         |
| <i>Ethiopia (R+P&amp;A)</i>                     | Africa           | 117876.227             | 18.52                                                             |
| <i>Finland (R+P&amp;A)</i>                      | Europe           | 5548.36                | 78.394997                                                         |
| <i>France (R+P&amp;A)</i>                       | Europe           | 65426.179              | 80.230003                                                         |

|                                                       |                   |             |           |
|-------------------------------------------------------|-------------------|-------------|-----------|
| <i>Germany (R+P&amp;A)</i>                            | Europe            | 83900.473   | 76.311996 |
| <i>Ghana (R+P&amp;A)</i>                              | Africa            | 31732.129   | 19.408001 |
| <i>Greece (R+P&amp;A)</i>                             | Europe            | 10370.744   | 71.838997 |
| <i>Guatemala (R)</i>                                  | Central America   | 18249.86    | 34.173    |
| <i>Guinea (R+P&amp;A)</i>                             | Africa            | 13497.244   | 19.118    |
| <i>Haiti (R)</i>                                      | Caribbean         | 11541.685   | 1.104     |
| <i>Hungary (R+P&amp;A)</i>                            | Europe            | 9634.164    | 62.805    |
| <i>India (R+P&amp;A)</i>                              | Asia              | 1393409.038 | 62.566002 |
| <i>Indonesia (R+P&amp;A)</i>                          | Asia              | 276361.783  | 60.48     |
| <i>Iran (R+P&amp;A)</i>                               | Asia              | 85028.759   | 68.567001 |
| <i>Iraq (R+P&amp;A)</i>                               | Asia              | 41179.35    | 18.407    |
| <i>Ireland (R+P&amp;A)</i>                            | Europe            | 4982.907    | 80.316002 |
| <i>Israel (non-Palestine territories) (R+P&amp;A)</i> | Asia              | 8789.774    | 73.681999 |
| <i>Italy (R+P&amp;A)</i>                              | Europe            | 60367.477   | 79.526001 |
| <i>Jamaica (R+P&amp;A)</i>                            | Caribbean         | 2973.463    | 23.152    |
| <i>Japan (R+P&amp;A)</i>                              | Asia              | 126050.804  | 80.220001 |
| <i>Kazakhstan (R+P&amp;A)</i>                         | Asia              | 18994.962   | 53.776001 |
| <i>Kenya (R+P&amp;A)</i>                              | Africa            | 54985.698   | 15.465    |
| <i>Lebanon (R+P&amp;A)</i>                            | Asia              | 6769.146    | 34.449001 |
| <i>Madagascar (R+P&amp;A)</i>                         | Africa            | 28427.328   | 4.178     |
| <i>Malawi (R)</i>                                     | Africa            | 19647.684   | 4.75      |
| <i>Malaysia (R)</i>                                   | Asia              | 32776.194   | 82.472    |
| <i>Mali (R+P&amp;A)</i>                               | Africa            | 20855.735   | 5.309     |
| <i>Mexico (R+P&amp;A)</i>                             | North America     | 130262.216  | 62.007    |
| <i>Morocco (R+P&amp;A)</i>                            | Africa            | 37344.795   | 63.360001 |
| <i>Mozambique (R+P&amp;A)</i>                         | Africa            | 32163.047   | 38.243999 |
| <i>Nepal (R+P&amp;A)</i>                              | Asia              | 29674.92    | 67.255997 |
| <i>Netherlands (R+P&amp;A)</i>                        | Europe            | 17173.099   | 71.258003 |
| <i>New Zealand (R+P&amp;A)</i>                        | The Pacific Ocean | 4860.643    | 84.446999 |
| <i>Nicaragua (R+P&amp;A)</i>                          | Central America   | 6702.385    | 70.509003 |
| <i>Niger (R+P&amp;A)</i>                              | Africa            | 25130.817   | 6.4000001 |
| <i>Nigeria (R+P&amp;A)</i>                            | Africa            | 211400.708  | 7.7280002 |
| <i>Norway (R+P&amp;A)</i>                             | Europe            | 5465.63     | 75.210999 |
| <i>Pakistan (R+P&amp;A)</i>                           | Asia              | 225199.937  | 54.462002 |
| <i>Panama (R)</i>                                     | Central America   | 4381.579    | 71.250999 |

|                                        |               |            |           |
|----------------------------------------|---------------|------------|-----------|
| <i>Paraguay (R)</i>                    | South America | 7219.638   | 47.284    |
| <i>Peru (R+P&amp;A)</i>                | South America | 33359.418  | 81.447998 |
| <i>Philippines (R+P&amp;A)</i>         | Asia          | 111046.913 | 62.463001 |
| <i>Poland (R+P&amp;A)</i>              | Europe        | 37797.005  | 59.139    |
| <i>Portugal (R+P&amp;A)</i>            | Europe        | 10167.925  | 85.746002 |
| <i>Romania (R)</i>                     | Europe        | 19127.774  | 41.969002 |
| <i>Russia (R+P&amp;A)</i>              | Europe/Asia   | 145912.025 | 50.223    |
| <i>Rwanda (R+P&amp;A)</i>              | Africa        | 13276.513  | 64.894997 |
| <i>South Africa (R)</i>                | Africa        | 60041.994  | 30.164    |
| <i>Saudi Arabia (R)</i>                | Asia          | 35340.683  | 71.239998 |
| <i>Senegal (R)</i>                     | Africa        | 17196.301  | 43.629002 |
| <i>Somalia (R)</i>                     | Africa        |            | 8.7150002 |
| <i>Spain (R)</i>                       | Europe        | 46745.216  | 78.759003 |
| <i>Sri Lanka (R+P&amp;A)</i>           | Asia          | 21497.31   | 67.513    |
| <i>Sudan (R+P&amp;A)</i>               | Africa        | 44909.353  | 8.2819996 |
| <i>Sweden (R)</i>                      | Europe        | 10160.169  | 71.448997 |
| <i>Tanzania (R+P&amp;A)</i>            | Africa        | 61498.437  | 5.8060002 |
| <i>Thailand (R+P&amp;A)</i>            | Asia          | 69950.85   | 73.386002 |
| <i>Trinidad and Tobago (R+P&amp;A)</i> | Caribbean     | 1403.375   | 50.816002 |
| <i>Tunisia (R)</i>                     | Africa        | 11935.766  | 53.875999 |
| <i>Turkey (R+P&amp;A)</i>              | Europe/Asia   | 85042.738  | 63.766998 |
| <i>Uganda (R+P&amp;A)</i>              | Africa        | 47123.531  | 23.105    |
| <i>UK (R+P&amp;A)</i>                  | Europe        | 68207.116  | 73.017998 |
| <i>Ukraine (R)</i>                     | Europe        | 43466.819  | 34.650002 |
| <i>USA (R+P&amp;A)</i>                 | North America | 332915.073 | 65.556    |
| <i>Uzbekistan (R+P&amp;A)</i>          | Asia          | 33935.763  | 43.478001 |
| <i>Venezuela (R+P&amp;A)</i>           | South America | 28704.954  | 50.243999 |
| <i>Zambia (R)</i>                      | Africa        | 18920.651  | 12.693    |
| <i>Zimbabwe (R+P&amp;A)</i>            | Africa        | 15092.171  | 25.409    |

R = Resource models; P&A = Political & Attitudinal models
